# Supplementary material for: Reactions of cadmium(ii) nitrate with 4-(trimethylammonio)benzenethiolate in the presence of N-donor ligands
Source: Royal Society of Chemistry journal article supplement (doi:10.1039/c1dt11663k), 2011-11-02
Supplement: c1dt11663k.pdf [file c1dt11663k.pdf]

## Electronic Supplementary Information

### Reactions of cadmium(II) nitrate with 4-(trimethylammonio)benzenethiolate in the presence of N-donor ligands

<sup>5</sup> Ai-Xia Zheng,<sup>a</sup> Hui-Fang Wang,<sup>a</sup> Chun-Ning Lü,<sup>a</sup> Zhi-Gang Ren,<sup>a</sup> Hong-Xi Li,<sup>a</sup> and Jian-Ping Lang<sup>\*a,b</sup>

<sup>a</sup> College of Chemistry, Chemical Engineering and Materials Science, Soochow University, Suzhou 215123, People's Republic of China

<sup>b</sup> State Key Laboratory of Coordination Chemistry, Nanjing University, Nanjing 210093, P. R. China

10

15

|                                                                                                                                                                                                                                    |    |
|------------------------------------------------------------------------------------------------------------------------------------------------------------------------------------------------------------------------------------|----|
| <b>Figure S1.</b> Electronic spectra of the product derived from the reaction of $\text{Cd}(\text{NO}_3)_2 \cdot 4\text{H}_2\text{O}$ and 2 equiv. of $\text{TabHPF}_6$ in the presence of $\text{Et}_3\text{N}$ .                 | S3 |
| <b>Figure S2.</b> The positive-ion ESI mass spectrum of the product derived from the reaction of $\text{Cd}(\text{NO}_3)_2 \cdot 4\text{H}_2\text{O}$ and 2 equiv. of $\text{TabHPF}_6$ in the presence of $\text{Et}_3\text{N}$ . | S3 |
| <b>Figure S3.</b> The positive-ion ESI mass spectrum of <b>1</b> .                                                                                                                                                                 | S3 |
| <b>Figure S4.</b> The positive-ion ESI mass spectrum of <b>2</b> .                                                                                                                                                                 | S4 |
| <b>Figure S5.</b> The positive-ion ESI mass spectrum of <b>3</b> .                                                                                                                                                                 | S4 |
| <b>Figure S6.</b> The positive-ion ESI mass spectrum of <b>4</b> .                                                                                                                                                                 | S4 |
| <b>Figure S7.</b> The positive-ion ESI mass spectrum of <b>5</b> .                                                                                                                                                                 | S5 |
| <b>Figure S8.</b> The positive-ion ESI mass spectrum of <b>6</b> .                                                                                                                                                                 | S5 |
| <b>Figure S9.</b> Electronic spectra of bppy and bdmppy in MeCN in a 1-cm-thick glass cell.                                                                                                                                        | S5 |

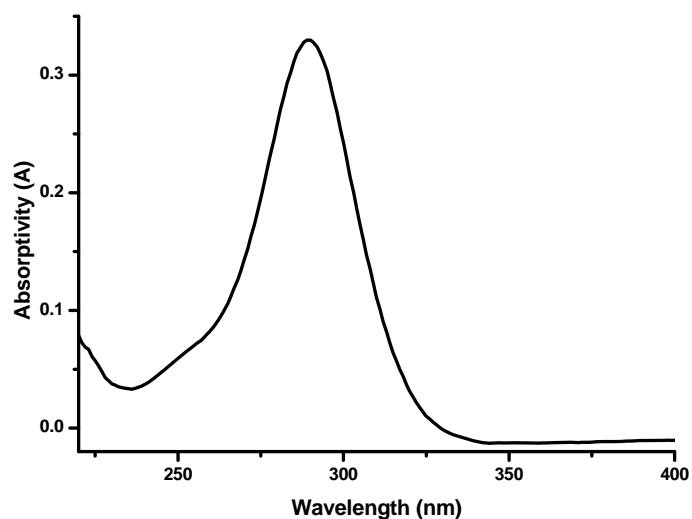

**Figure S1.** Electronic spectra of the product ( $4.2 \times 10^{-4}$  M) derived from the reaction of  $\text{Cd}(\text{NO}_3)_2 \cdot 4\text{H}_2\text{O}$  and 2 equiv. of  $\text{TabHPF}_6$  in the presence of  $\text{Et}_3\text{N}$  in MeCN in a 1-cm-thick glass cell.

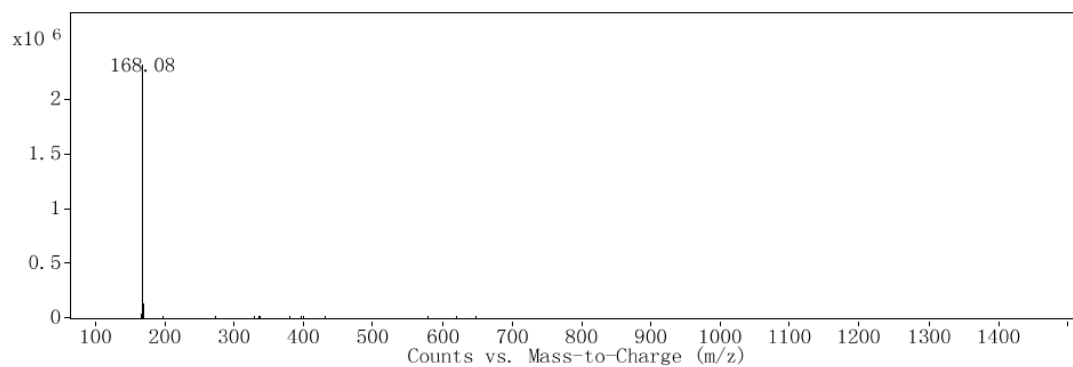

5

**Figure S2.** The positive-ion ESI mass spectrum of the product derived from the reaction of  $\text{Cd}(\text{NO}_3)_2 \cdot 4\text{H}_2\text{O}$  and 2 equiv. of  $\text{TabHPF}_6$  in the presence of  $\text{Et}_3\text{N}$ .

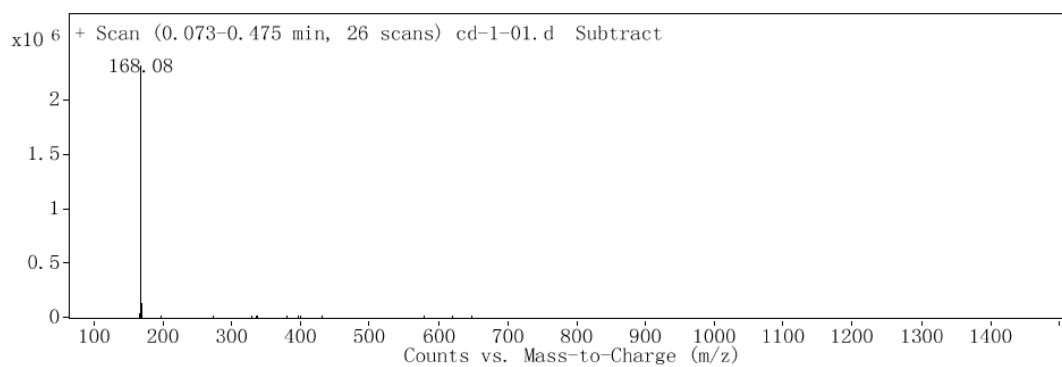

10

**Figure S3.** The positive-ion ESI mass spectrum of **1**.

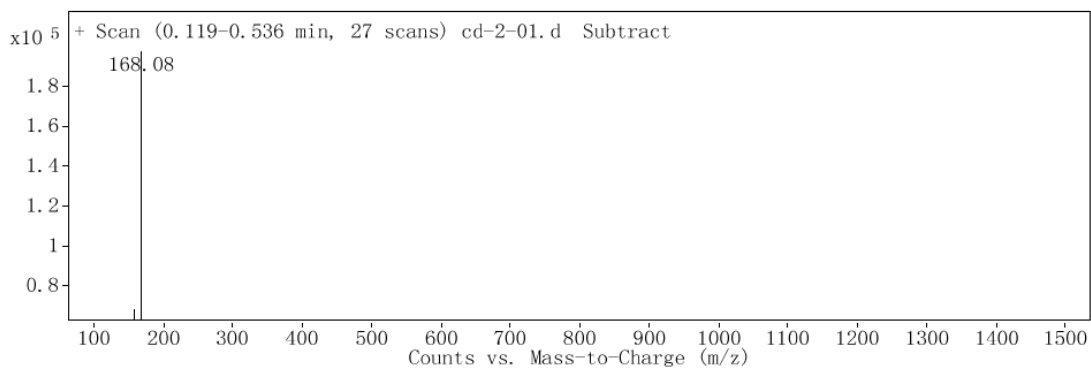

Figure S4. The positive-ion ESI mass spectrum of 2.

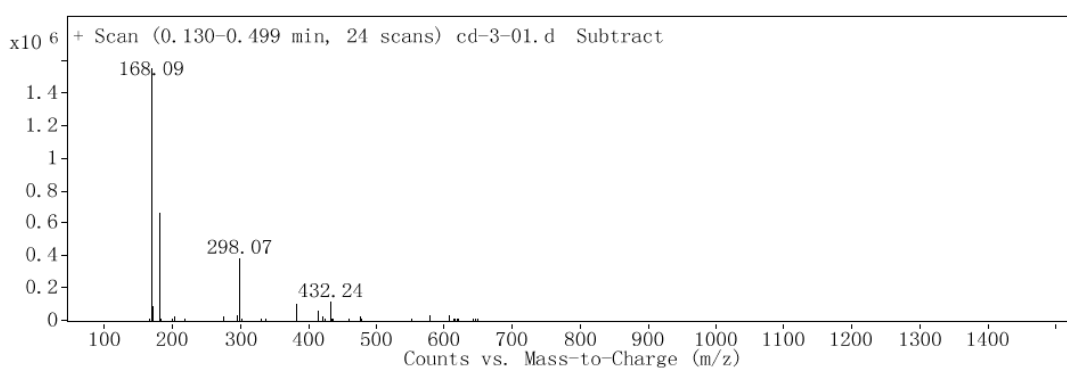

5

Figure S5. The positive-ion ESI mass spectrum of 3.

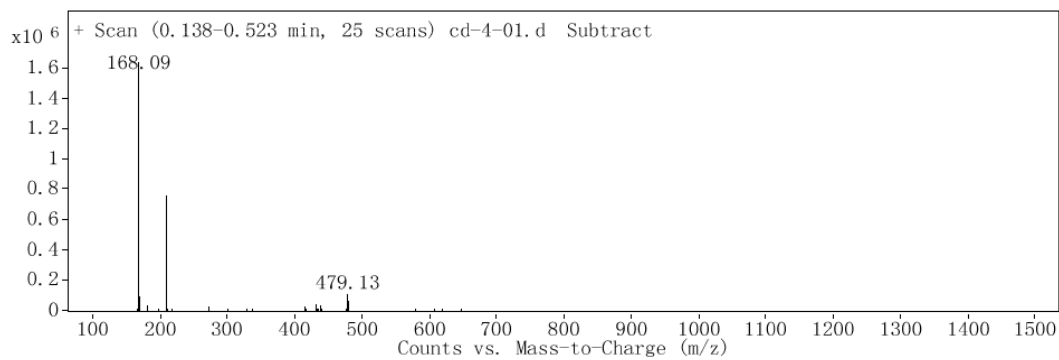

10

Figure S6. The positive-ion ESI mass spectrum of 4.

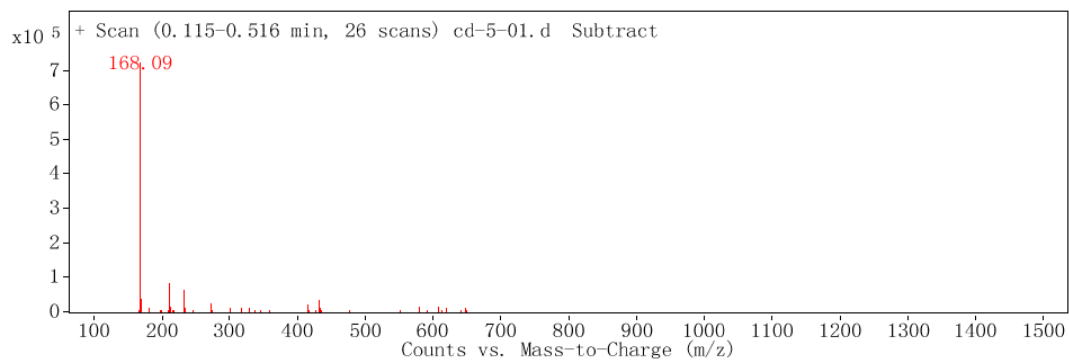

Figure S7. The positive-ion ESI mass spectrum of **5**.

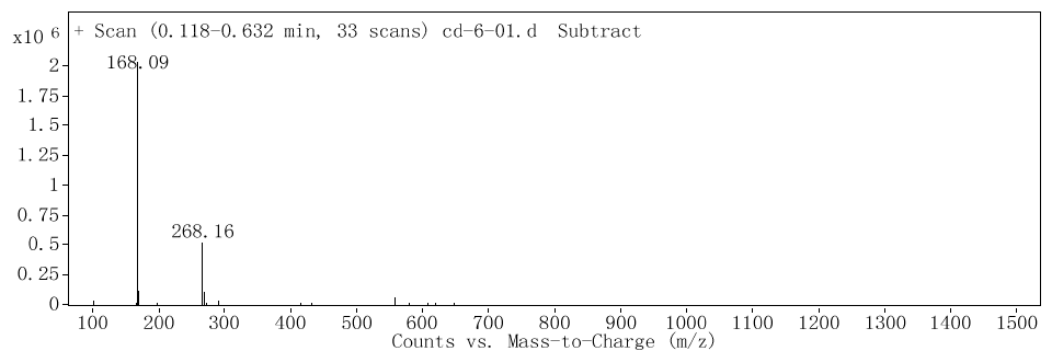

5

Figure S8. The positive-ion ESI mass spectrum of **6**.

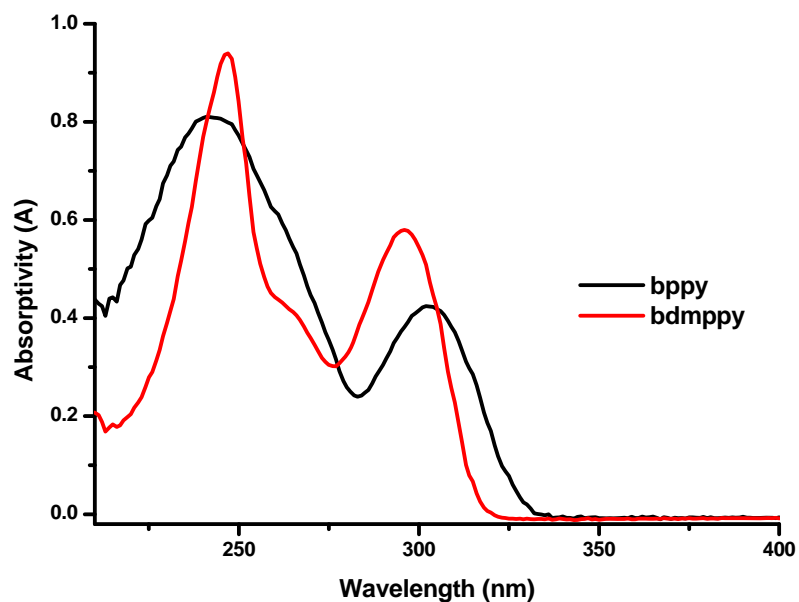

Figure S9. Electronic spectra of bppy and bdmppy in MeCN in a 1-cm-thick glass cell.
